# Supplementary material for: Sex Chromosome-Specific Regulation in the Drosophila Male Germline But Little Evidence for Chromosomal Dosage Compensation or Meiotic Inactivation
Source: PLoS Biol. 2011 Aug 16;9(8):e1001126. doi: 10.1371/journal.pbio.1001126 (PMC3156688; doi:10.1371/journal.pbio.1001126)
Supplement: Table S2 — Median log2 magnitude of changes in expression between stages of spermatogenesis (FDR = 0.01). (PDF) [file pbio.1001126.s005.pdf]

Supplementary Table 2. Median log2 magnitude of changes in expression between stages of spermatogenesis (FDR = 0.01)

| <b><i>FDR = 0.01</i></b>     | <u>Early changes (premeiosis:meiosis)</u> |                 |           | <u>Late changes (meiosis:postmeiosis)</u> |       |           | <u>Net change (premeiosis:postmeiosis)</u> |                 |           |
|------------------------------|-------------------------------------------|-----------------|-----------|-------------------------------------------|-------|-----------|--------------------------------------------|-----------------|-----------|
| chromosomal arm              | down                                      | up              | down - up | down                                      | up    | down - up | down                                       | up              | down - up |
| 2L                           | -1.07                                     | 1.21            | 0.14      | -1.68                                     | 1.27  | -0.42     | -1.91                                      | 1.52            | -0.39     |
| 2R                           | -1.04                                     | 1.24            | 0.20      | -1.65                                     | 1.33  | -0.32     | -1.97                                      | 1.49            | -0.48     |
| 3L                           | -1.01                                     | 1.21            | 0.20      | -1.71                                     | 1.21  | -0.50     | -1.92                                      | 1.29            | -0.63     |
| 3R                           | -1.04                                     | 1.18            | 0.14      | -1.68                                     | 1.19  | -0.49     | -1.92                                      | 1.42            | -0.51     |
| 4                            | -1.08                                     | 1.11            | 0.02      | -1.16                                     | 2.16  | 1.00      | -1.63                                      | 1.72            | 0.09      |
| X                            | -1.06                                     | <b>1.02</b>     | -0.04     | <b>-1.50</b>                              | 1.28  | -0.23     | <b>-1.73</b>                               | <b>1.31</b>     | -0.42     |
| A*                           | -1.04                                     | <b>1.21</b>     | 0.17      | <b>-1.68</b>                              | 1.24  | -0.44     | <b>-1.93</b>                               | <b>1.43</b>     | -0.50     |
| X vs A ( <i>MW P</i> -value) | 0.376                                     | <b>5.34E-09</b> |           | <b>5.93E-03</b>                           | 0.247 |           | <b>1.64E-04</b>                            | <b>5.49E-03</b> |           |

\*autosomal totals exclude genes on the 4th chromosome
