# Supplementary material for: Sex Chromosome-Specific Regulation in the Drosophila Male Germline But Little Evidence for Chromosomal Dosage Compensation or Meiotic Inactivation
Source: PLoS Biol. 2011 Aug 16;9(8):e1001126. doi: 10.1371/journal.pbio.1001126 (PMC3156688; doi:10.1371/journal.pbio.1001126)
Supplement: Table S5 — Number of genes with significant differences in expression between stages of spermatogenesis (2-fold cutoff). (PDF) [file pbio.1001126.s008.pdf]

Supplementary Table 5. Number of genes with significant differences in expression between stages of spermatogenesis (2-fold cutoff)

| <i>2-fold cutoff</i>          |             | Early changes (premeiosis:meiosis) |         |                 |                | Late changes (meiosis:postmeiosis) |                |       |         | Net change (premeiosis:postmeiosis) |                |                 |                |
|-------------------------------|-------------|------------------------------------|---------|-----------------|----------------|------------------------------------|----------------|-------|---------|-------------------------------------|----------------|-----------------|----------------|
| chromosomal arm               | # expressed | down                               |         | up              |                | down                               |                | up    |         | down                                |                | up              |                |
| 2L                            | 2204        | 318                                | (14.4%) | 353             | (16.0%)        | 545                                | (24.7%)        | 305   | (13.8%) | 707                                 | (32.1%)        | 471             | (21.4%)        |
| 2R                            | 2356        | 380                                | (16.1%) | 351             | (14.9%)        | 553                                | (23.5%)        | 361   | (15.3%) | 712                                 | (30.2%)        | 507             | (21.5%)        |
| 3L                            | 2335        | 329                                | (14.1%) | 337             | (14.4%)        | 535                                | (22.9%)        | 302   | (12.9%) | 723                                 | (31.0%)        | 434             | (18.6%)        |
| 3R                            | 3009        | 441                                | (14.7%) | 371             | (12.3%)        | 714                                | (23.7%)        | 406   | (13.5%) | 943                                 | (31.3%)        | 590             | (19.6%)        |
| 4                             | 58          | 16                                 | (27.6%) | 4               | (6.9%)         | 11                                 | (19.0%)        | 11    | (19.0%) | 24                                  | (41.4%)        | 4               | (6.9%)         |
| X                             | 1943        | 318                                | (16.4%) | <b>173</b>      | <b>(8.9%)</b>  | <b>350</b>                         | <b>(18.0%)</b> | 312   | (16.1%) | <b>540</b>                          | <b>(27.8%)</b> | <b>328</b>      | <b>(16.9%)</b> |
| A*                            | 9904        | 1468                               | (14.8%) | <b>1412</b>     | <b>(14.3%)</b> | <b>2347</b>                        | <b>(23.7%)</b> | 1374  | (13.9%) | <b>3085</b>                         | <b>(31.1%)</b> | <b>2002</b>     | <b>(20.2%)</b> |
| X vs A ( <i>FET P</i> -value) |             | 0.083                              |         | <b>4.63E-11</b> |                | <b>2.57E-08</b>                    |                | 0.013 |         | <b>0.003</b>                        |                | <b>6.65E-04</b> |                |

\*autosomal totals exclude genes on the 4th chromosome
